# Supplementary material
Source: PubMed Central journal article supplement (PMC2802121)

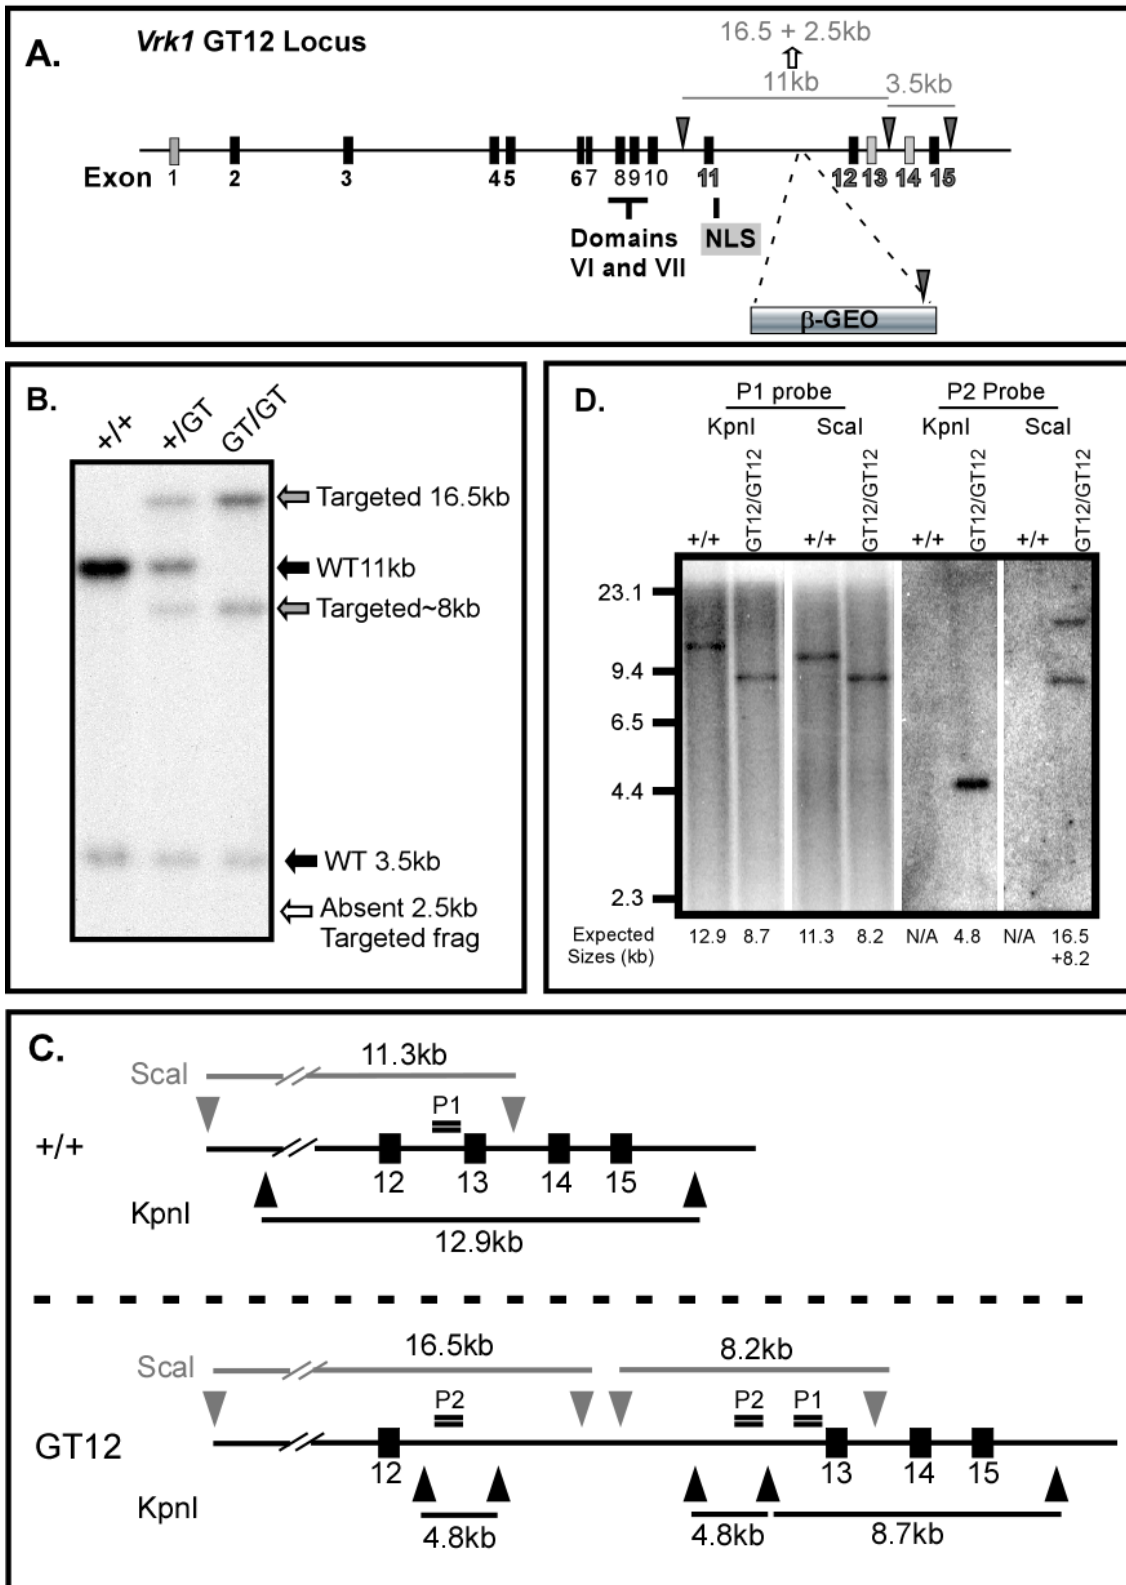

Supplement: supp_109.079095_biolreprod.109.079095-1.pdf [file supp_109.079095_biolreprod.109.079095-1.pdf]

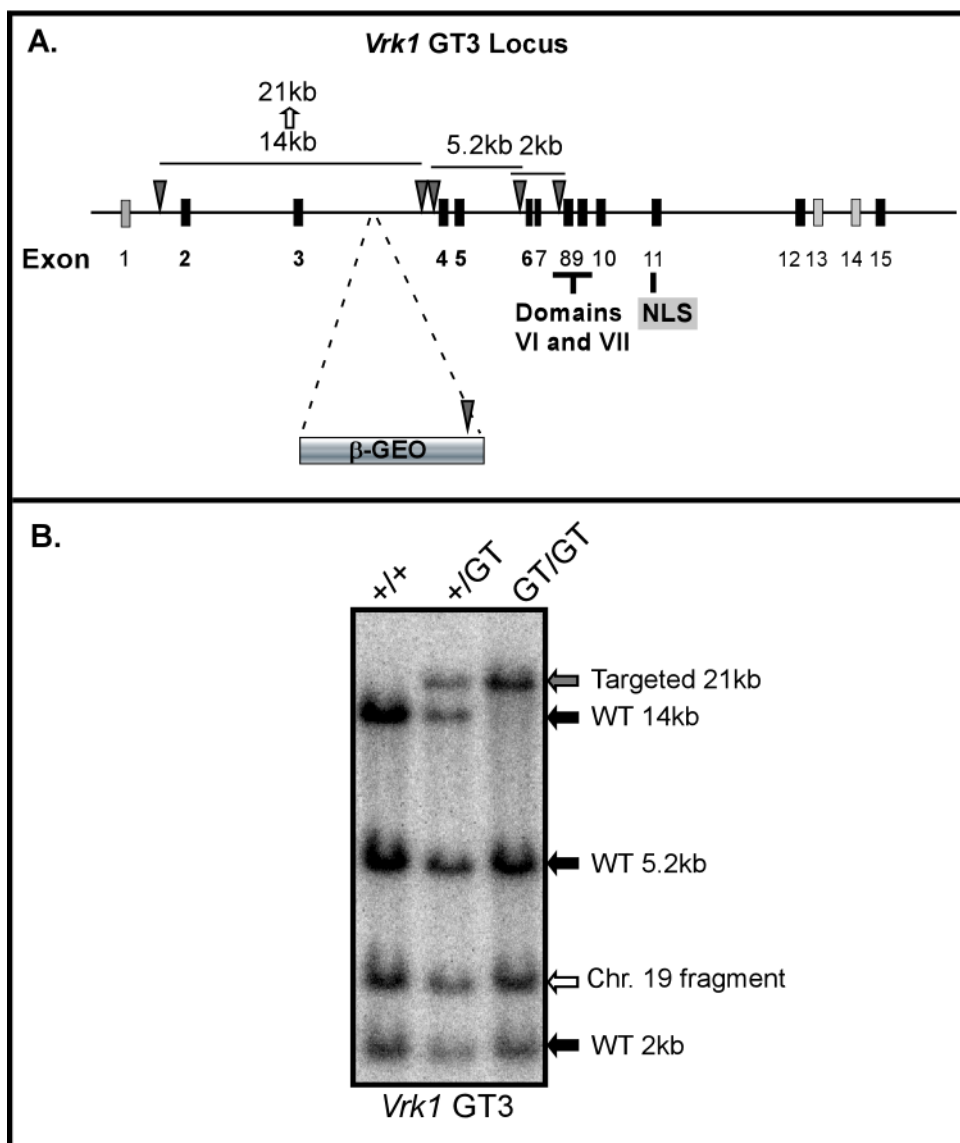

Supplement: supp_109.079095_biolreprod.109.079095-2.pdf [file supp_109.079095_biolreprod.109.079095-2.pdf]

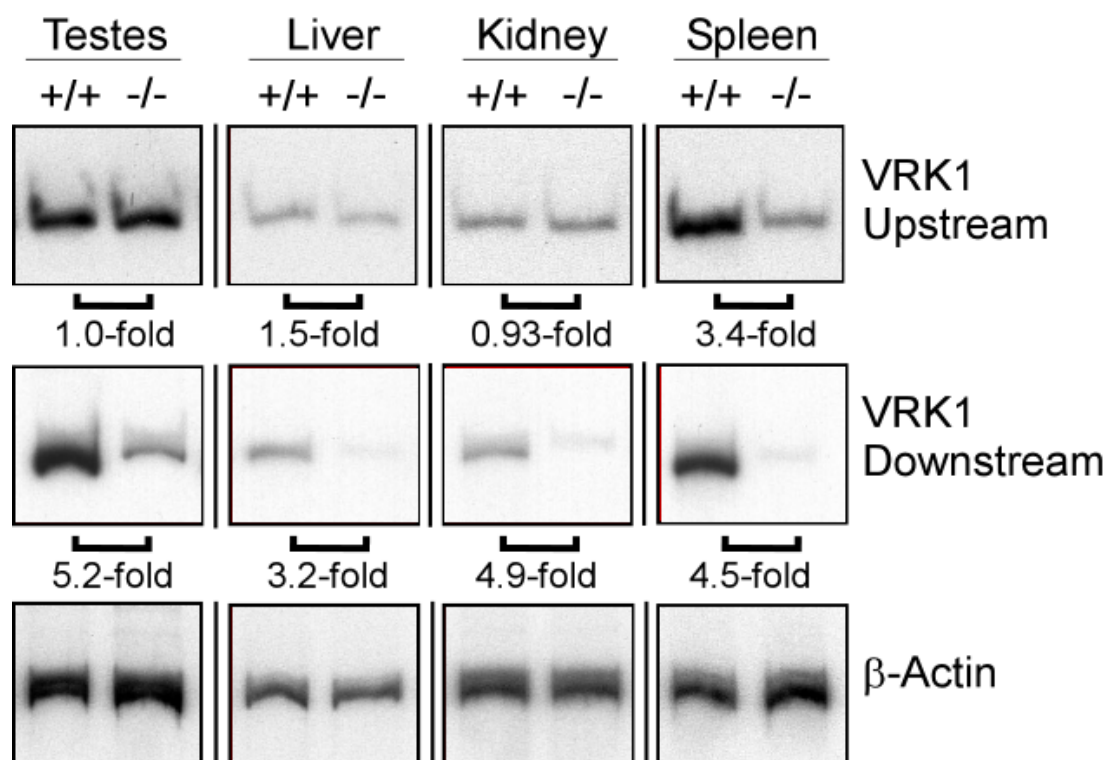

Supplement: supp_109.079095_biolreprod.109.079095-3.pdf [file supp_109.079095_biolreprod.109.079095-3.pdf]

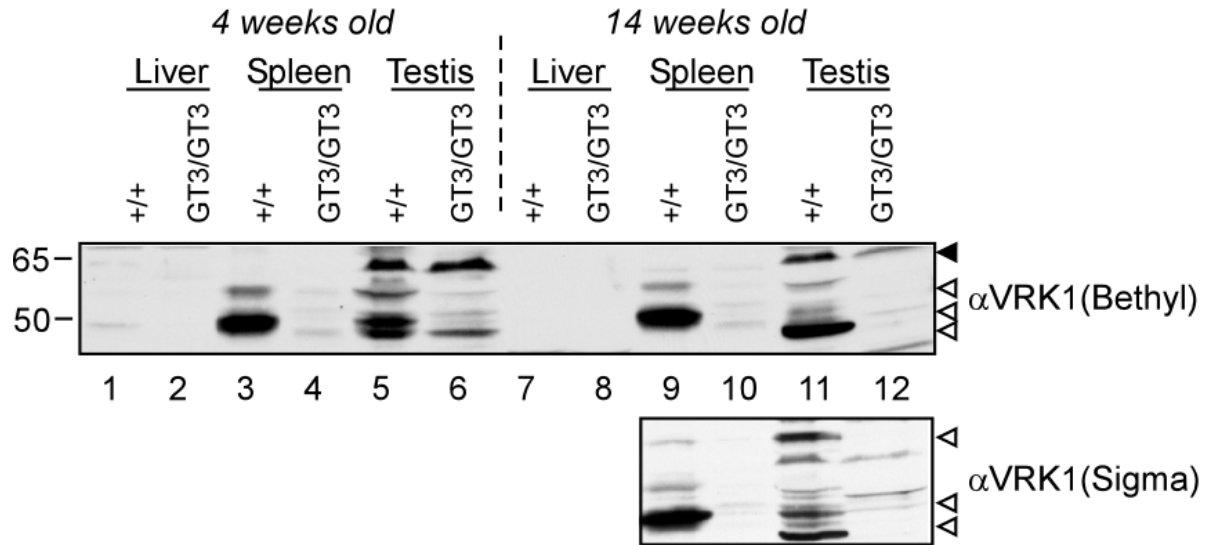

Supplement: supp_109.079095_biolreprod.109.079095-4.pdf [file supp_109.079095_biolreprod.109.079095-4.pdf]

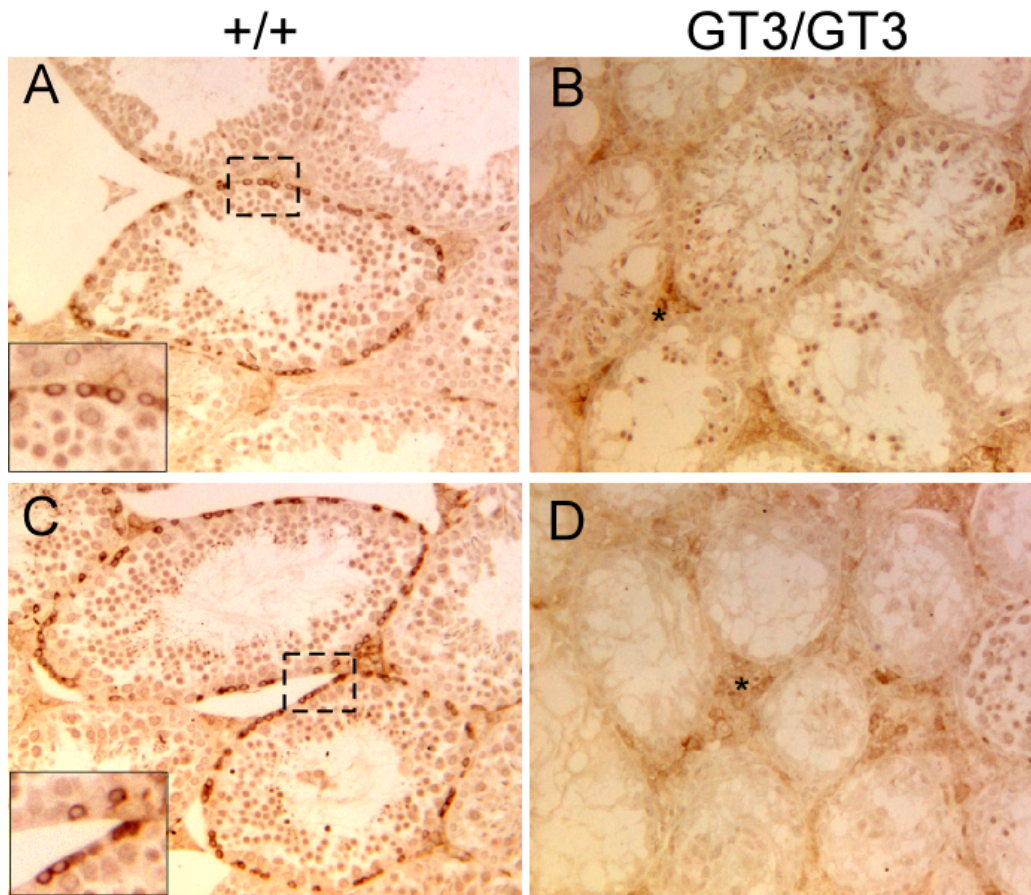

Supplement: supp_109.079095_biolreprod.109.079095-5.pdf [file supp_109.079095_biolreprod.109.079095-5.pdf]

A

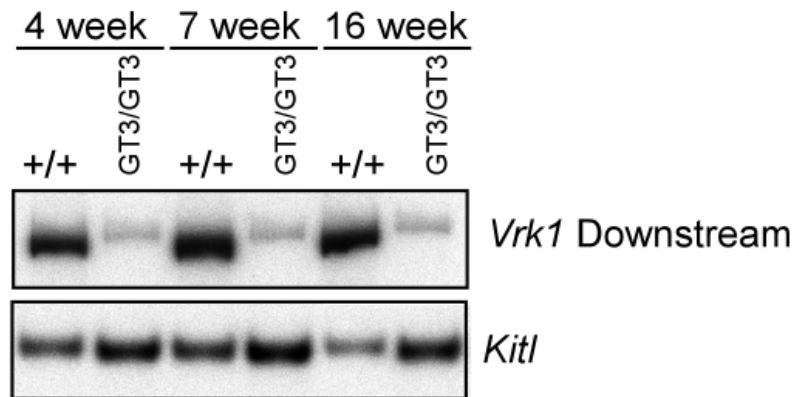

B

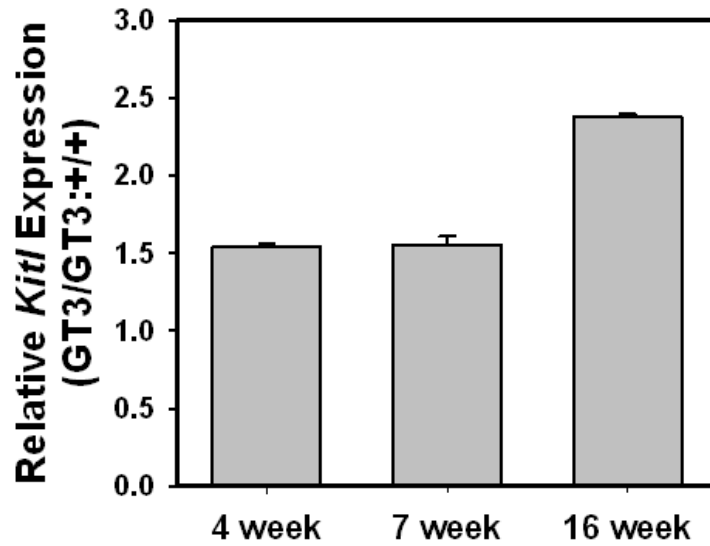

Supplement: supp_109.079095_biolreprod.109.079095-6.pdf [file supp_109.079095_biolreprod.109.079095-6.pdf]
